# Supplementary material for: Temporal and spatial trends of PCBs, DDTs, HCHs, and HCB in Swedish marine biota 1969–2012
Source: Springer Nature journal article supplement (doi:10.1007/s13280-015-0673-5), 2015-05-27
Supplement: MOESM1 [file 15654318]

***AMBIO***

Electronic Supplementary Material

*This supplementary material has not been peer reviewed.*

Title: **Temporal and spatial trends of PCBs, DDTs, HCHs and HCB in Swedish marine biota 1969–2012**

Authors: Elisabeth Nyberg, Suzanne Faxneld, Sara Danielsson, Ulla Eriksson, Aroha Miller, Anders Bignert

**Table S1** Sampling sites, coordinates, species and start year/end year for analyses of PCBs, DDTs, HCHs and HCB (P=perch, H=herring, E=eelpout, C=cod, B=blue mussel) within the Swedish National Monitoring Program for Contaminants in Marine Biota. Month of sampling, age and size (total length for fish or total shell length for blue mussels) are shown the first time the species occur and cover all sites for that particular species except for blue mussels, which differ in age and size between the Baltic Sea site and the Swedish west coast sites. The first column refers to the sampling site numbers in Figure 1

| No in map | Sampling site                   | Latitude | Longitude | Species                     | Start year for analyses of PCBs, DDTs, HCHs, HCB                 | Month of sampling   | Age (years)       | Total length or shell length (cm) |
|-----------|---------------------------------|----------|-----------|-----------------------------|------------------------------------------------------------------|---------------------|-------------------|-----------------------------------|
| 1         | Rånefjärden                     | 65° 45'N | 22° 25'E  | herring                     | 07 <sup>b</sup>                                                  | Aug–Oct             | 2–9<br>(most 3–5) | 14–22                             |
| 2         | Harufjärden                     | 65° 35'N | 22° 53'E  | herring                     | 87 <sup>a</sup>                                                  |                     |                   |                                   |
| 3         | Kinnbäcksfjärden                | 65° 03'N | 20° 53'E  | herring                     | 08 <sup>b</sup>                                                  |                     |                   |                                   |
| 4         | Holmöarna                       | 63° 41'N | 20° 53'E  | perch<br>herring<br>eelpout | P:80 <sup>c</sup> ,<br>H:09 <sup>b</sup><br>E:95–07 <sup>c</sup> | P:Aug–Oct,<br>E:Nov | P:3–5,<br>E:2–5   | P:15–21,<br>E:18–24               |
| 5         | Gaviksfjärden                   | 62° 52'N | 18° 14'E  | herring                     | 07 <sup>b</sup>                                                  |                     |                   |                                   |
| 6         | Långvindsfjärden                | 61° 27'N | 17° 10'E  | herring                     | 07 <sup>b</sup>                                                  |                     |                   |                                   |
| 7         | Bothnian Sea,<br>offshore site  | 60° 57'N | 18° 57'E  | herring                     | 08 <sup>b</sup>                                                  |                     |                   |                                   |
| 8         | Ängskärsklubb                   | 60° 32'N | 18° 09'E  | herring                     | autumn: 78 <sup>a</sup> ,<br>spring: 72 <sup>b</sup>             |                     |                   |                                   |
| 9         | Lagnö                           | 59° 34'N | 18° 50'E  | herring                     | 07 <sup>b</sup>                                                  |                     |                   |                                   |
| 10        | Baltic Proper,<br>offshore site | 58° 60'N | 19° 52'E  | herring                     | 08 <sup>b</sup>                                                  |                     |                   |                                   |
| 11        | Landsort                        | 58° 42'N | 18° 04'E  | herring                     | 78 <sup>a</sup>                                                  |                     |                   |                                   |
| 12        | Fjällbacka                      | 58° 37'N | 11° 15'E  | eelpout<br>blue mussel      | E: 95–07 <sup>c</sup> , 08 <sup>d</sup> ,<br>B: 84 <sup>e</sup>  | B:Sep–Dec           | B:6–19            | B:2–3                             |
| 13        | Väderöarna                      | 58° 31'N | 10° 54'E  | herring                     | 95 <sup>a</sup>                                                  |                     |                   |                                   |

| No in map | Sampling site     | Latitude | Longitude | Species                         | Start year for analyses of PCBs, DDTs, HCHs, HCB                                     | Month of sampling | Age (years) | Total length or shell length (cm) |
|-----------|-------------------|----------|-----------|---------------------------------|--------------------------------------------------------------------------------------|-------------------|-------------|-----------------------------------|
| 14        | Kvädöfjärden      | 58° 2'N  | 16° 46'E  | perch<br>eelpout<br>blue mussel | P:80 <sup>c</sup> ,<br>E:95–07 <sup>c</sup> , 08 <sup>d</sup> ,<br>B:95 <sup>e</sup> |                   | B:2–8       | B:5–10                            |
| 15        | Nidingen          | 57° 18'N | 11° 54'E  | blue mussel                     | 82 <sup>e</sup>                                                                      |                   |             |                                   |
| 16        | Stora Karlsö      | 57° 16'N | 17° 58'E  | guillemot egg                   | 69 <sup>c</sup>                                                                      | May               |             |                                   |
| 17        | Fladen            | 57° 14'N | 11° 50'E  | herring<br>cod                  | H: 80 <sup>a</sup> ,<br>C: 80 <sup>c</sup>                                           | C:Sep–Oct         | C:2–4       | C:33–66                           |
| 18        | Byxelkrok         | 57° 19'N | 17° 30'E  | herring                         | 07 <sup>b</sup>                                                                      |                   |             |                                   |
| 19        | SE Gotland        | 56° 53'N | 18° 38'E  | cod                             | 80 <sup>c</sup>                                                                      |                   |             |                                   |
| 20        | Kullen            | 56° 19'N | 12° 23'E  | herring                         | 07 <sup>b</sup>                                                                      |                   |             |                                   |
| 21        | Utlängan          | 55° 57'N | 15° 47'E  | herring                         | autumn: 80 <sup>a</sup> ,<br>spring: 72 <sup>b</sup>                                 |                   |             |                                   |
| 22        | Västra Hanöbukten | 55° 45'N | 14° 17'E  | herring                         | 07 <sup>b</sup>                                                                      |                   |             |                                   |
| 23        | Abbekås           | 55° 18'N | 13° 36'E  | herring                         | 07 <sup>b</sup>                                                                      |                   |             |                                   |

<sup>a</sup> 12 individual specimens per year, <sup>b</sup> 2 pool per year of 12 individuals, <sup>c</sup> 10 individual specimens per year, <sup>d</sup> 2 pools per year of 10 individuals per pool, <sup>e</sup> 5 pools per year of 20 individuals. Deviations occurred during the monitoring period, especially at the beginning of the time series.

**Table S2** Trend for the entire period and the last 10 years (in %) for **CB-153** assessed from the annual geometric mean ( $\mu\text{g g}^{-1}$  lipid weight) in herring, perch, cod, eelpout, blue mussel and guillemot egg. P shows the p-value and – after the p-value means that the trend is negative and + means that the trend is positive; -/+ p<0.05, --/++ p<0.01, ---/+++ p<0.001. YRQ: years required to detect an annual change of 10% with a power of 80%. LDT: lowest detectable trend within a 10 year period with a power of 80%. Last year's CB-153 concentration values are estimated from the trend if p<0.05 and from the mean (m) if no trend is present. Numbers in brackets are 95% confidence intervals (C.I.). The total number of samples and the number of years for the various time-series are shown in columns two to four.

| Site number<br>(from figure 1) | Matrix,<br>Sampling site | N<br>samples | N<br>years | Period<br>(Years) | Trend %<br>(95% C.I.) | P          | YRQ | LDT<br>% | Last year $\mu\text{g/g}$ l.w.<br>(95% C.I.) |
|--------------------------------|--------------------------|--------------|------------|-------------------|-----------------------|------------|-----|----------|----------------------------------------------|
| <b>Herring muscle</b>          |                          |              |            |                   |                       |            |     |          |                                              |
| 2                              | Harufjärden              | 333          | 24         | 87-12             | -2.6(-5.1,-0.08)      | 0.0418 -   | 13  | 16       | 0.037 (0.027,0.052)                          |
| 2                              | Harufjärden              |              | 10         | 03-12             | 6.1(-3.9,16)          | 0.1937     | 13  | 15       |                                              |
| 8                              | Ångskärsklubb            | 332          | 24         | 89-12             | -5.2(-7.5,-2.9)       | 0.0002 --- | 13  | 14       | 0.064 (0.047,0.087)                          |
| 8                              | Ångskärsklubb            |              | 10         | 03-12             | -5.8(-17,5.6)         | 0.2746     | 14  | 17       |                                              |
| 8                              | Ångskärsklubb, spring    | 277          | 24         | 89-12             | -3.8(-7.1,-0.57)      | 0.0223 -   | 15  | 20       | 0.123 (0.079,0.19)                           |
| 8                              | Ångskärsklubb, spring    |              | 10         | 03-12             | -8.8(-25,7.3)         | 0.2435     | 17  | 25       |                                              |
| 11                             | Landsort                 | 354          | 26         | 87-12             | -5.9(-8.1,-3.7)       | 0.0000 --- | 13  | 15       | 0.042 (0.031,0.059)                          |
| 11                             | Landsort                 |              | 10         | 03-12             | -6.7(-13,-0.67)       | 0.0327 -   | 10  | 7        |                                              |
| 21                             | Utlängan                 | 309          | 25         | 88-12             | -2.2(-4.2,-0.16)      | 0.0337 -   | 12  | 13       | 0.069 (0.052,0.092)                          |
| 21                             | Utlängan                 |              | 10         | 03-12             | -1.7(-8.6,5.2)        | 0.5861     | 10  | 9.9      |                                              |
| 21                             | Utlängan, spring         | 272          | 24         | 87-12             | -4.6(-6.8,-2.5)       | 0.0002 --- | 12  | 14       | 0.095 (0.070,0.13)                           |
| 21                             | Utlängan, spring         |              | 10         | 03-12             | -2.1(-14,9.7)         | 0.6877     | 14  | 18       |                                              |
| 17                             | Fladen                   | 381          | 25         | 88-12             | -5.9(-7.3,-4.4)       | 0.0000 --- | 10  | 9.4      | 0.019 (0.015,0.023)                          |
| 17                             | Fladen                   |              | 10         | 03-12             | -0.69(-5.0,3.7)       | 0.7203     | 8   | 6.1      |                                              |
| 13                             | Väderöarna               | 291          | 17         | 95-12             | -3.0(-6.9,0.90)       | 0.1181     | 13  | 15       | 0.016 (0.011,0.023) m                        |
| 13                             | Väderöarna               |              | 9          | 03-12             | 2.1(-9.7,14)          | 0.6831     | 14  | 17       |                                              |
| <b>Cod liver</b>               |                          |              |            |                   |                       |            |     |          |                                              |
| 19                             | SE Gotland               | 187          | 24         | 89-12             | -1.2(-2.7,0.31)       | 0.1087     | 10  | 9.1      | 0.16 (0.13,0.20) m                           |
| 19                             | SE Gotland               |              | 10         | 03-12             | -0.54(-6.3,5.2)       | 0.8167     | 9   | 8.6      |                                              |
| 17                             | Fladen                   | 194          | 23         | 89-12             | .39(-1.9,2.7)         | 0.7241     | 12  | 13       | 0.47 (0.35,0.64) m                           |
| 17                             | Fladen                   |              | 10         | 03-12             | 9.0(3.1,15)           | 0.0078 ++  | 10  | 8.5      |                                              |
| <b>Perch muscle</b>            |                          |              |            |                   |                       |            |     |          |                                              |
| 4                              | Holmöarna                | 179          | 18         | 95-12             | -6.4(-9.9,-3.0)       | 0.0013 --  | 12  | 13       | 0.039 (0.028,0.056)                          |
| 4                              | Holmöarna                |              | 9          | 03-12             | 3.4(-4.2,11)          | 0.3228     | 11  | 11       |                                              |
| 14                             | Kvädöfjärden             | 251          | 25         | 89-12             | -3.3(-6.4,-0.24)      | 0.034 -    | 15  | 19       | 0.033 (0.022,0.050)                          |
| 14                             | Kvädöfjärden             |              | 10         | 03-12             | 9.3(-2.0,21)          | 0.0927     | 14  | 17       |                                              |
| <b>Eelpout muscle</b>          |                          |              |            |                   |                       |            |     |          |                                              |
| 4                              | Holmöarna                | 96           | 11         | 95-07             | -3.0(-14,7.7)         | 0.5416     | 16  | 23       | 0.12 (0.059,0.25) m                          |
| 4                              | Holmöarna                |              | 9          | 98-07             | -7.6(-23,8.1)         | 0.2893     | 17  | 23       |                                              |

|                      |              |     |    |       |                 |            |    |     |                     |
|----------------------|--------------|-----|----|-------|-----------------|------------|----|-----|---------------------|
| 14                   | Kvädöfjärden | 121 | 17 | 95-12 | -8.8(-12,-5.3)  | 0.0001 --- | 12 | 12  | 0.069 (0.050,0.095) |
| 14                   | Kvädöfjärden |     | 10 | 03-12 | -6.4(-11,-1.8)  | 0.0123 -   | 8  | 6.5 |                     |
| 12                   | Fjällbacka   | 131 | 18 | 95-12 | -.33(-4.8,4.2)  | 0.8524     | 14 | 18  | 0.26 (0.17,0.41) m  |
| 12                   | Fjällbacka   |     | 10 | 03-12 | -3.4(-9.5,2.8)  | 0.2428     | 10 | 9.2 |                     |
| <b>Blue mussel</b>   |              |     |    |       |                 |            |    |     |                     |
| 15                   | Nidingen     | 97  | 25 | 88-12 | -8.1(-9.4,-6.7) | 0.0000 --- | 10 | 9.4 | 0.015 (0.013,0.019) |
| 15                   | Nidingen     |     | 10 | 03-12 | -12(-18,-5.5)   | 0.0034 --  | 11 | 10  |                     |
| 12                   | Fjällbacka   | 95  | 24 | 88-12 | -4.4(-6.4,-2.4) | 0.0002 --- | 12 | 13  | 0.029 (0.022,0.039) |
| 12                   | Fjällbacka   |     | 10 | 03-12 | -1.6(-6.1,3.1)  | 0.451      | 8  | 6.6 |                     |
| 14                   | Kvädöfjärden | 90  | 18 | 95-12 | -2.9(-3.9,-1.9) | 0.001---   | 10 | 9.5 | 0.043 (0.039,0.048) |
| 14                   | Kvädöfjärden |     | 10 | 03-12 | -6.4(-9.1,-3.7) | 0.001 ---  | 11 | 11  |                     |
| <b>Guillemot egg</b> |              |     |    |       |                 |            |    |     |                     |
| 16                   | Stora Karlsö | 248 | 25 | 88-12 | -7.5(-8.4,-6.5) | 0.0000 --- | 8  | 6.2 | 1.4 (1.2,1.6)       |
| 16                   | Stora Karlsö |     | 10 | 03-12 | -11(-16,-7.0)   | 0.0000 --- | 9  | 6.8 |                     |

**Table S3** Trend for the entire period and the last 10 years (in %) for **CB-118** assessed from the annual geometric mean ( $\mu\text{g g}^{-1}$  lipid weight) in herring, perch, cod, eelpout, blue mussel and guillemot egg. P shows the p-value and – after the p-value means that the trend is negative and + means that the trend is positive; -/+ p<0.05, --/++ p<0.01, ---/+++ p<0.001. YRQ: years required to detect an annual change of 10% with a power of 80%. LDT: lowest detectable trend within a 10 year period with a power of 80%. Last year's CB-118 concentration values are estimated from the trend if p<0.05 and from the mean (m) if no trend is present. Numbers in brackets are 95% confidence intervals (C.I.). The total number of samples and the number of years for the various time-series are shown in columns two to four

| Site number<br>(from figure 1) | Matrix,<br>Sampling site | N<br>samples | N<br>years | Year  | Trend %<br>(95% C.I.) | P          | YRQ | LDT<br>% | Last year $\mu\text{g/g}$ l.w.<br>(95% C.I.) |
|--------------------------------|--------------------------|--------------|------------|-------|-----------------------|------------|-----|----------|----------------------------------------------|
| <b>Herring muscle</b>          |                          |              |            |       |                       |            |     |          |                                              |
| 2                              | Harufjärden              | 333          | 24         | 87-12 | -4.5(-7.5,-1.5)       | 0.0055 --  | 15  | 19       | 0.011 (0.007,0.016)                          |
| 2                              | Harufjärden              |              | 10         | 03-12 | 5.7(-5.3,17)          | 0.2643     | 14  | 16       |                                              |
| 8                              | Ängskärsklubb            | 332          | 24         | 89-12 | -6.6(-9.4,-3.7)       | 0.0001 --- | 14  | 18       | 0.015 (0.010,0.022)                          |
| 8                              | Ängskärsklubb            |              | 10         | 03-12 | -6.0(-20,8.2)         | 0.3582     | 16  | 22       |                                              |
| 8                              | Ängskärsklubb spring     | 267          | 23         | 89-12 | -6.1(-9.7,-2.5)       | 0.0022 --  | 16  | 23       | 0.034 (0.021,0.055)                          |
| 8                              | Ängskärsklubb spring     |              | 10         | 03-12 | -11(-29,7.6)          | 0.2147     | 19  | 29       |                                              |
| 11                             | Landsort                 | 354          | 26         | 87-12 | -7.8(-9.5,-6.1)       | 0.0001 --- | 11  | 11       | 0.015 (0.012,0.020)                          |
| 11                             | Landsort                 |              | 10         | 03-12 | -5.0(-8.9,-1.0)       | 0.0194     | 8   | 5.6      |                                              |
| 21                             | Utlängan                 | 309          | 25         | 88-12 | -5.7(-7.7,-3.7)       | 0.0000 --- | 12  | 13       | 0.018 (0.014,0.024)                          |
| 21                             | Utlängan                 |              | 10         | 03-12 | -2.5(-9.7,4.6)        | 0.4387     | 11  | 10       |                                              |
| 21                             | Utlängan spring          | 272          | 24         | 87-12 | -7.8(-9.8,-5.8)       | 0.0000 --- | 12  | 13       | 0.027 (0.020,0.035)                          |
| 21                             | Utlängan spring          |              | 10         | 03-12 | -5.1(-15,4.9)         | 0.2714     | 13  | 15       |                                              |
| 17                             | Fladen                   | 381          | 25         | 88-12 | -8.7(-11,-6.9)        | 0.0000 --- | 11  | 11       | 0.006 (0.004,0.007)                          |
| 17                             | Fladen                   |              | 10         | 03-12 | -2.0(-6.7,2.8)        | 0.3702     | 9   | 6.7      |                                              |
| 13                             | Väderöarna               | 291          | 17         | 95-12 | -4.2(-8.0,-0.41)      | 0.0309     | 13  | 15       | 0.006 (0.004,0.008)                          |
| 13                             | Väderöarna               |              | 9          | 03-12 | 1.2(-9.5,12)          | 0.7909     | 13  | 15       |                                              |
| <b>Cod liver</b>               |                          |              |            |       |                       |            |     |          |                                              |
| 19                             | SE Gotland               | 187          | 24         | 89-12 | -3.5(-5.4,-1.7)       | 0.0008 --- | 11  | 11       | 0.054 (0.042,0.070)                          |
| 19                             | SE Gotland               |              | 10         | 03-12 | -1.1(-8.9,6.8)        | 0.7569     | 11  | 11       |                                              |
| 17                             | Fladen                   | 195          | 23         | 89-12 | -1.5(-3.5,0.47)       | 0.1242     | 11  | 12       | 0.096 (0.074,0.13) m                         |
| 17                             | Fladen                   |              | 10         | 03-12 | 6.1(0.51,12)          | 0.0348 +   | 9   | 8.2      |                                              |
| <b>Perch muscle</b>            |                          |              |            |       |                       |            |     |          |                                              |
| 4                              | Holmöarna                | 179          | 18         | 95-12 | -7.5(-11,-4.1)        | 0.0004 --- | 12  | 13       | 0.010 (0.007,0.014)                          |
| 4                              | Holmöarna                |              | 9          | 03-12 | 1.7(-6.1,9.5)         | 0.6222     | 11  | 11       |                                              |
| 14                             | Kvädöfjärden             | 197          | 20         | 89-12 | -1.8(-5.2,1.6)        | 0.2699     | 14  | 17       | 0.012 (0.008,0.018) m                        |
| 14                             | Kvädöfjärden             |              | 10         | 03-12 | 9.2(-1.1,19)          | 0.0717     | 13  | 16       |                                              |
| <b>Eelpout muscle</b>          |                          |              |            |       |                       |            |     |          |                                              |
| 4                              | Holmöarna                | 96           | 11         | 95-07 | -4.0(-14,6.0)         | 0.3913     | 16  | 21       | 0.025 (0.012,0.049) m                        |
| 4                              | Holmöarna                |              | 9          | 98-07 | -10(-23,3.4)          | 0.1195     | 15  | 20       |                                              |
| 14                             | Kvädöfjärden             | 121          | 17         | 95-12 | -7.7(-12,-3.6)        | 0.0013 --  | 13  | 15       | 0.019 (0.013,0.028)                          |

|                      |              |     |    |       |                 |            |    |     |                     |
|----------------------|--------------|-----|----|-------|-----------------|------------|----|-----|---------------------|
| 14                   | Kvädöfjärden |     | 10 | 03-12 | -5.0(-10,0.41)  | 0.0637     | 9  | 7.7 |                     |
| 12                   | Fjällbacka   | 131 | 18 | 95-12 | -1.5(-5.8,2.8)  | 0.4832     | 14 | 17  | 0.98 (0.064,0.15) m |
| 12                   | Fjällbacka   |     | 10 | 03-12 | -3.3(-11,4.3)   | 0.3483     | 11 | 12  |                     |
| <b>Blue mussel</b>   |              |     |    |       |                 |            |    |     |                     |
| 15                   | Nidingen     | 97  | 25 | 88-12 | -9.9(-11,-8.3)  | 0.0000 --- | 11 | 11  | 0.004 (0.003,0.004) |
| 15                   | Nidingen     |     | 10 | 03-12 | -9.9(-15,-4.7)  | 0.0027 --  | 9  | 8.0 |                     |
| 12                   | Fjällbacka   | 95  | 24 | 88-12 | -6.5(-9.1,-3.9) | 0.0001 --- | 14 | 18  | 0.011 (0.008,0.017) |
| 12                   | Fjällbacka   |     | 10 | 03-12 | -2.4(-7.7,3.3)  | 0.3600     | 9  | 8.1 |                     |
| 14                   | Kvädöfjärden | 90  | 18 | 95-12 | -4.2(-5.5,-2.9) | 0.0021 --  | 12 | 12  | 0.011 (0.009,0.012) |
| 14                   | Kvädöfjärden |     | 10 | 03-12 | -9.0(-12,-5.8)  | 0.001 ---  | 12 | 13  |                     |
| <b>Guillemot egg</b> |              |     |    |       |                 |            |    |     |                     |
| 16                   | Stora Karlsö | 248 | 25 | 88-12 | -7.9(-8.6,-7.2) | 0.0000 --- | 7  | 5.0 | 0.92 (0.83,1.0)     |
| 16                   | Stora Karlsö |     | 10 | 03-12 | -9.4(-14,-4.9)  | 0.0016 --  | 9  | 6.8 |                     |

**Table S4** Trend for the entire period and the last 10 years (in %) for **DDE** assessed from the annual geometric mean ( $\mu\text{g g}^{-1}$  lipid weight) in herring, perch, cod, eelpout, blue mussel and guillemot egg. P shows the p-value and – after the p-value means that the trend is negative and + means that the trend is positive; -/+ p<0.05, -/+ p<0.01, -/+ p<0.001. YRQ: years required to detect an annual change of 10% with a power of 80%. LDT: lowest detectable trend within a 10 year period with a power of 80%. Last year's DDE concentration values are estimated from the trend if p<0.05 and from the mean (m) if no trend is present. Numbers in brackets are 95% confidence intervals (C.I.). The total number of samples and the number of years for the various time-series are shown in columns two to four

| Site number<br>(from figure 1) | Matrix<br>Sampling site | N<br>samples | N<br>years | Year  | Trend %<br>(95% C.I.) | P          | YRQ | LDT<br>% | Last year $\mu\text{g/g l.w.}$<br>(95% C.I.) |
|--------------------------------|-------------------------|--------------|------------|-------|-----------------------|------------|-----|----------|----------------------------------------------|
| <b>Herring muscle</b>          |                         |              |            |       |                       |            |     |          |                                              |
| 2                              | Harufjärden             | 513          | 33         | 78-12 | -7.8(-9.6,-5.9)       | 0.0000 --- | 15  | 20       | 0.024 (0.017,0.035)                          |
| 2                              | Harufjärden             |              | 10         | 03-12 | 4.4(-6.2,15)          | 0.3686     | 13  | 16       |                                              |
| 8                              | Ångskärsklubb           | 501          | 33         | 78-12 | -7.4(-8.9,-5.9)       | 0.0000 --- | 13  | 16       | 0.054 (0.041,0.072)                          |
| 8                              | Ångskärsklubb           |              | 10         | 03-12 | -6.9(-24,9.8)         | 0.3690     | 18  | 26       |                                              |
| 8                              | Ångskärsklubb spring    | 650          | 39         | 72-12 | -6.1(-7.5,-4.7)       | 0.0000 --- | 15  | 19       | 0.17 (0.12,0.23)                             |
| 8                              | Ångskärsklubb spring    |              | 10         | 03-12 | -9.4(-30,11)          | 0.328      | 20  | 33       |                                              |
| 11                             | Landsort                | 486          | 34         | 78-12 | -5.6(-6.7,-4.4)       | 0.0000 --- | 12  | 12       | 0.13 (0.11,0.17)                             |
| 11                             | Landsort                |              | 10         | 03-12 | -7.1(-13,-1.5)        | 0.0194-    | 9   | 8.1      |                                              |
| 21                             | Utlängan                | 391          | 33         | 80-12 | -4.1(-5.3,-2.9)       | 0.0000 --- | 12  | 12       | 0.16 (0.12,0.20)                             |
| 21                             | Utlängan                |              | 10         | 03-12 | -1.3(-10,7.3)         | 0.7289     | 12  | 14       |                                              |
| 21                             | Utlängan spring         | 633          | 38         | 72-12 | -9.7(-11,-8.8)        | 0.0000 --- | 11  | 12       | 0.14 (0.12,0.17)                             |
| 21                             | Utlängan spring         |              | 10         | 03-12 | -3.1(-12,6.2)         | 0.468      | 12  | 14       |                                              |
| 17                             | Fladen                  | 556          | 33         | 80-12 | -7.8(-9.0,-6.5)       | 0.0000 --- | 12  | 13       | 0.018 (0.014,0.023)                          |
| 17                             | Fladen                  |              | 10         | 03-12 | -0.06(-5.5,5.4)       | 0.9302     | 9   | 7.8      |                                              |
| 13                             | Väderöarna              | 289          | 17         | 95-12 | -4.8(-8.2,-1.5)       | 0.0074 --  | 12  | 13       | 0.014 (0.010,0.020)                          |
| 13                             | Väderöarna              |              | 9          | 03-12 | .00(-7.6,7.6)         | 0.9492     | 11  | 11       |                                              |
| <b>Cod liver</b>               |                         |              |            |       |                       |            |     |          |                                              |
| 19                             | SE Gotland              | 320          | 32         | 80-12 | -4.7(-5.9,-3.4)       | 0.0000 --- | 11  | 12       | 0.30 (0.24,0.37)                             |
| 19                             | SE Gotland              |              | 10         | 03-12 | -3.4(-14,7.0)         | 0.4783     | 13  | 15       |                                              |
| 17                             | Fladen                  | 371          | 32         | 80-12 | -4.4(-5.6,-3.1)       | 0.0000 --- | 12  | 12       | 0.18 (0.15,0.23)                             |
| 17                             | Fladen                  |              | 10         | 03-12 | 3.6(-1.3,8.5)         | 0.1281     | 9   | 7.0      |                                              |
| <b>Perch muscle</b>            |                         |              |            |       |                       |            |     |          |                                              |
| 4                              | Holmöarna               | 269          | 25         | 80-12 | -9.2(-11,-7.8)        | 0.0000 --- | 12  | 13       | 0.021 (0.016,0.028)                          |
| 4                              | Holmöarna               |              | 9          | 03-12 | 2.0(-3.9,7.9)         | 0.4605     | 9   | 8.2      |                                              |
| 14                             | Kvädöfjärden            | 281          | 30         | 80-12 | -8.4(-11,-5.8)        | 0.0000 --- | 18  | 27       | 0.024 (0.015,0.038)                          |
| 14                             | Kvädöfjärden            |              | 10         | 03-12 | 11(0.31,23)           | 0.0439 +   | 14  | 16       |                                              |
| <b>Eelpout muscle</b>          |                         |              |            |       |                       |            |     |          |                                              |
| 4                              | Holmöarna               | 95           | 11         | 98-07 | -2.0(-10,6.2)         | 0.595      | 14  | 17       | 0.10 (0.057,0.18) m                          |
| 4                              | Holmöarna               |              | 10         | 03-12 | -4.8(-17,7.9)         | 0.4020     | 15  | 18       |                                              |
| 14                             | Kvädöfjärden            | 120          | 17         | 95-12 | -8.2(-13,-3.5)        | 0.0022 --  | 14  | 17       | 0.070 (0.044,0.11)                           |



|                      |              |     |    |       |                 |            |    |     |                      |
|----------------------|--------------|-----|----|-------|-----------------|------------|----|-----|----------------------|
| 14                   | Kvädöfjärden |     | 10 | 03-12 | -3.0(-7.9,1.8)  | 0.1833     | 9  | 6.9 |                      |
| 12                   | Fjällbacka   | 129 | 18 | 95-12 | -1.1(-4.6,2.5)  | 0.5385     | 12 | 14  | 0.075 (0.053,0.11) m |
| 12                   | Fjällbacka   |     | 10 | 03-12 | -2.0(-5.2,1.3)  | 0.1937     | 7  | 4.6 |                      |
| <b>Blue mussel</b>   |              |     |    |       |                 |            |    |     |                      |
| 15                   | Nidingen     | 96  | 28 | 82-12 | -6.5(-8.2,-4.7) | 0.0000 --- | 14 | 16  | 0.018 (0.013,0.025)  |
| 15                   | Nidingen     |     | 10 | 03-12 | 1.5(-5.5,9.0)   | 0.6491     | 11 | 10  |                      |
| 12                   | Fjällbacka   | 99  | 28 | 84-12 | -6.6(-8.1,-5.0) | 0.0000 --- | 12 | 13  | 0.012 (0.010,0.016)  |
| 12                   | Fjällbacka   |     | 10 | 03-12 | 1.5(-3.8,7.0)   | 0.5461     | 9  | 7.5 |                      |
| 14                   | Kvädöfjärden | 90  | 18 | 95-12 | -3.6(-4.7,-2.4) | 0.0001 --- | 11 | 11  | 0.046(0.041,0.051)   |
| 14                   | Kvädöfjärden |     | 10 | 03-12 | -7.4(-10,-4.4)  | 0.001 ---  | 12 | 12  |                      |
| <b>Guillemot egg</b> |              |     |    |       |                 |            |    |     |                      |
| 16                   | Stora Karlsö | 440 | 42 | 69-12 | -9.4(-10,-8.7)  | 0.0000 --- | 11 | 11  | 6.5 (5.5,7.8)        |
| 16                   | Stora Karlsö |     | 10 | 03-12 | -9.0(-13,-4.7)  | 0.0020 --  | 8  | 6.5 |                      |

**Table S5** Trend for the entire period and the last 10 years (in %) for  $\gamma$ -HCH in herring, perch, cod, eelpout, and blue mussel. assessed from the annual geometric mean ( $\mu\text{g g}^{-1}$  lipid weight) in herring, perch, cod, eelpout, and blue mussel. P shows the p-value and – after the p-value means that the trend is negative and + means that the trend is positive; +/- p<0.05, -/+ p<0.01, -/+ p<0.001. YRQ: years required to detect an annual change of 10% with a power of 80%. LDT: lowest detectable trend within a 10 year period with a power of 80%. Last year's  $\gamma$ -HCH /  $\beta$ -HCH concentration values are estimated from the trend if p<0.05 and from the mean (m) if no trend is present. Numbers in brackets are 95% confidence intervals (C.I.). The total number of samples and the number of years for the various time-series are shown in columns two to four

| Site number<br>(from figure 1) | Matrix<br>Sampling site | N<br>samples | N<br>years | Year    | Trend %<br>(95% C.I.) | P          | YRQ | LDT<br>% | Last year $\mu\text{g/g l.w.}$<br>(95% C.I.) |
|--------------------------------|-------------------------|--------------|------------|---------|-----------------------|------------|-----|----------|----------------------------------------------|
| <b>Herring muscle</b>          |                         |              |            |         |                       |            |     |          |                                              |
| 2                              | Harufjärden             | 333          | 24         | 87-12   | -9.7(-11,-8.3)        | 0.0000 --- | 9   | 8.2      | 0.002 (0.002,0.002)                          |
| 2                              | Harufjärden             |              | 10         | 03-12   | -1.6(-3.9,0.71)       | 0.1451     | 6   | 3.2      |                                              |
| 8                              | Ångskärsklubb           | 332          | 24         | 89-12   | -12(-14,-10)          | 0.0000 --- | 11  | 12       | 0.002 (0.001,0.002)                          |
| 8                              | Ångskärsklubb           |              | 10         | 03-12   | -2.4(-4.7,-0.03)      | 0.0463 -   | 6   | 3.3      |                                              |
| 8                              | Ångskärsklubb spring    | 276          | 24         | 89-12   | -11(-13,-9.4)         | 0.0000 --- | 11  | 11       | 0.002 (0.002,0.003)                          |
| 8                              | Ångskärsklubb spring    |              | 10         | 03-12   | 0.55(-5.1,6.1)        | 0.8101     | 9   | 8.0      |                                              |
| 11                             | Landsort                | 354          | 26         | 87-12   | -13(-14,-12)          | 0.0000 --- | 9   | 7.2      | 0.002 (0.002,0.003)                          |
| 11                             | Landsort                |              | 10         | 03-12   | -9.6(-14,-5.3)        | 0.0009 --- | 8   | 6.1      |                                              |
| 21                             | Utlängan                | 360          | 25         | 88-12   | -14(-15,-13)          | 0.0000 --- | 8   | 6.1      | 0.002 (0.002,0.003)                          |
| 21                             | Utlängan                |              | 10         | 03-12   | -8.8(-13,-4.4)        | 0.0019 --  | 8   | 6.3      |                                              |
| 21                             | Utlängan spring         | 272          | 24         | 87-12   | -13(-15,-12)          | 0.0000 --- | 11  | 11       | 0.003 (0.002,0.003)                          |
| 21                             | Utlängan spring         |              | 10         | 03-12   | -2.0(-8.5,4.5)        | 0.5051     | 10  | 9.3      |                                              |
| 17                             | Fladen                  | 381          | 25         | 88-12   | -15(-17,-13)          | 0.0000 --- | 12  | 12       | 0.001 (0.001,0.002)                          |
| 17                             | Fladen                  |              | 10         | 03 - 12 | -14(-21,-8.1)         | 0.0008 --- | 10  | 9.0      |                                              |
| 13                             | Väderöarna              | 290          | 17         | 95-12   | -14(-18,-10)          | 0.0000 --- | 13  | 15       | 0.001 (0.001,0.002)                          |
| 13                             | Väderöarna              |              | 9          | 03-12   | -8.5(-14,-2.9)        | 0.0090 --  | 9   | 7.7      |                                              |
| <b>Cod liver</b>               |                         |              |            |         |                       |            |     |          |                                              |
| 19                             | SE Gotland              | 187          | 24         | 89-12   | -15(-16,-14)          | 0.0000 --- | 8   | 6.0      | 0.002 (0.002,0.002)                          |
| 19                             | SE Gotland              |              | 10         | 03-12   | -11(-14,-6.8)         | 0.0002 --- | 8   | 5.3      |                                              |
| 17                             | Fladen                  | 194          | 23         | 89-12   | -18(-20,-16)          | 0.0000 --- | 11  | 12       | 0.001 (0.001,0.001)                          |
| 17                             | Fladen                  |              | 10         | 03-12   | -18(-26,-9.8)         | 0.0010 --  | 11  | 12       |                                              |
| <b>Perch muscle</b>            |                         |              |            |         |                       |            |     |          |                                              |
| 4                              | Holmöarna               | 179          | 18         | 89-12   | -3.5(-5.7,-1.4)       | 0.0028 --  | 10  | 9.4      | 0.004 (0.003,0.005)                          |
| 4                              | Holmöarna               |              | 9          | 03-12   | -1.4(-3.7,1.0)        | 0.2181     | 6   | 3.2      |                                              |
| 14                             | Kvädöfjärden            | 197          | 20         | 89-12   | -4.9(-7.3,-2.5)       | 0.0004 --- | 11  | 12       | 0.004 (0.003,0.005)                          |
| 14                             | Kvädöfjärden            |              | 10         | 03-12   | -1.6(-4.5,1.3)        | 0.2399     | 7   | 4.1      |                                              |
| <b>Eelpout muscle</b>          |                         |              |            |         |                       |            |     |          |                                              |
| 4                              | Holmöarna               | 95           | 11         | 95-07   | -8.7(-12,-5.3)        | 0.0004 --- | 9   | 7.1      | 0.005 (0.004,0.006)                          |
| 4                              | Holmöarna               |              | 9          | 98-07   | -7.7(-13,-2.5)        | 0.0104-    | 9   | 7.5      |                                              |

|                    |              |     |    |       |                 |            |    |     |                     |
|--------------------|--------------|-----|----|-------|-----------------|------------|----|-----|---------------------|
| 14                 | Kvädöfjärden | 120 | 17 | 95-12 | -7.7(-10,-5.3)  | 0.0000 --- | 10 | 9.1 | 0.004 (0.003,0.005) |
| 14                 | Kvädöfjärden |     | 10 | 03-12 | -3.1(-6.5,0.31) | 0.0670 -   | 7  | 4.9 |                     |
| 12                 | Fjällbacka   | 123 | 18 | 95-12 | -5.5(-9.1,-1.8) | 0.0067 --  | 13 | 15  | 0.004 (0.003,0.007) |
| 12                 | Fjällbacka   |     | 10 | 03-12 | 4.5(-3.0,13)    | 0.2097     | 11 | 11  |                     |
| <b>Blue mussel</b> |              |     |    |       |                 |            |    |     |                     |
| 15                 | Nidingen     | 99  | 27 | 81-12 | -12(-13,-9.8)   | 0.0000 --- | 13 | 16  | 0.002 (0.002,0.003) |
| 15                 | Nidingen     |     | 10 | 03-12 | -1.6(-5.5,2.5)  | 0.3978     | 8  | 5.8 |                     |
| 12                 | Fjällbacka   | 96  | 25 | 83-12 | -13(-14,-11)    | 0.0000 --- | 13 | 15  | 0.002 (0.001,0.003) |
| 12                 | Fjällbacka   |     | 10 | 03-12 | -1.2(-5.2,2.9)  | 0.5128     | 8  | 5.8 |                     |
| 14                 | Kvädöfjärden | 90  | 18 | 95-12 | -11(-13,-9.1)   | 0.0000 --- | 10 | 8.7 | 0.003 (0.002,0.003) |
| 14                 | Kvädöfjärden |     | 10 | 03-12 | -7.3(-12,-2.2)  | 0.0118 -   | 9  | 7.7 |                     |

**Table S6** Trend for the entire period and the last 10 years (in %) for  $\beta$ -HCH in herring, perch, cod, eelpout, blue mussel and guillemot egg. Assessed from the annual geometric mean ( $\mu\text{g g}^{-1}$  lipid weight) in herring, perch, cod, eelpout, blue mussel and guillemot egg. P shows the p-value and – after the p-value means that the trend is negative and + means that the trend is positive; -/+ p<0.05, --/+++ p<0.01, ---/++++ p<0.001. YRQ: years required to detect an annual change of 10% with a power of 80%. LDT: lowest detectable trend within a 10 year period with a power of 80%. Last year's  $\gamma$ -HCH /  $\beta$ -HCH concentration values are estimated from the trend if p<0.05 and from the mean (m) if no trend is present. Numbers in brackets are 95% confidence intervals (C.I.). The total number of samples and the number of years for the various time-series are shown in columns two to four.

| Site number<br>(from figure 1) | Matrix<br>Sampling site | N<br>samples | N<br>years | Year    | Trend %<br>(95% C.I.) | P          | YRQ | LDT<br>% | Last year $\mu\text{g/g l.w.}$<br>(95% C.I.) |
|--------------------------------|-------------------------|--------------|------------|---------|-----------------------|------------|-----|----------|----------------------------------------------|
| <b>Herring muscle</b>          |                         |              |            |         |                       |            |     |          |                                              |
| 2                              | Harufjärden             | 307          | 23         | 87-12   | -6.3(-7.1,-5.5)       | 0.0000 --- | 7   | 4.6      | 0.002 (0.002,0.003)                          |
| 2                              | Harufjärden             |              | 10         | 03-12   | -3.9(-6.0,-1.7)       | 0.0030 --  | 6   | 3.0      |                                              |
| 8                              | Ängskärsklubb           | 302          | 22         | 89-12   | -6.7(-8.4,-5.0)       | 0.0000 --- | 10  | 9.3      | 0.005 (0.004,0.006)                          |
| 8                              | Ängskärsklubb           |              | 10         | 03-12   | -7.2(-13,-1.5)        | 0.0200 -   | 9   | 8.3      |                                              |
| 8                              | Ängskärsklubb spring    | 277          | 24         | 89-12   | -6.5(-7.6,-5.4)       | 0.0000 --- | 8   | 6.4      | 0.006 (0.005,0.007)                          |
| 8                              | Ängskärsklubb spring    |              | 10         | 03-12   | -4.2(-9.4,1.1)        | 0.1020     | 9   | 7.5      |                                              |
| 11                             | Landsort                | 353          | 26         | 87-12   | -6.0(-7.0,-5.0)       | 0.0000 --- | 8   | 6.6      | 0.009 (0.008,0.010)                          |
| 11                             | Landsort                |              | 10         | 03-12   | -4.6(-8.8,-.44)       | 0.0330 -   | 8   | 5.9      |                                              |
| 21                             | Utlängan                | 360          | 25         | 88-12   | -7.6(-8.7,-6.4)       | 0.0000 --- | 9   | 7.1      | 0.006 (0.006,0.008)                          |
| 21                             | Utlängan                |              | 10         | 03-12   | -5.4(-11,-.11)        | 0.0450 -   | 9   | 7.6      |                                              |
| 21                             | Utlängan spring         | 272          | 24         | 87-12   | -7.7(-9.2,-6.2)       | 0.0000 --- | 10  | 9.6      | 0.006 (0.005,0.007)                          |
| 21                             | Utlängan spring         |              | 10         | 03-12   | -5.8(-13,1.2)         | 0.0900     | 11  | 10       |                                              |
| 17                             | Fladen                  | 381          | 25         | 88-12   | -4.7(-7.2,-2.2)       | 0.0000 --- | 14  | 16       | 0.003 (0.002,0.004)                          |
| 17                             | Fladen                  |              | 10         | 03 - 12 | -15(-22,-8.3)         | 0.0000 --- | 10  | 9.7      |                                              |
| 13                             | Väderöarna              | 231          | 14         | 97-12   | -5.4(-8.0,-2.8)       | 0.0000 --- | 9   | 7.8      | 0.003 (0.002,0.002)                          |
| 13                             | Väderöarna              |              | 9          | 03-12   | -8.7(-14,-3.2)        | 0.0080 --  | 9   | 7.6      |                                              |
| <b>Cod liver</b>               |                         |              |            |         |                       |            |     |          |                                              |
| 19                             | SE Gotland              | 187          | 24         | 89-12   | -7.7(-8.7,-6.7)       | 0.0000 --- | 8   | 5.9      | 0.008 (0.007,0.009)                          |
| 19                             | SE Gotland              |              | 10         | 03-12   | -6.6(-11,-1.9)        | 0.0120 -   | 9   | 6.7      |                                              |
| 17                             | Fladen                  | 169          | 22         | 89-12   | -6.5(-9.5,-3.6)       | 0.0000 --- | 14  | 17       | 0.003 (0.002,0.004)                          |
| 17                             | Fladen                  |              | 10         | 03-12   | -12(-21,-3.2)         | 0.0140 -   | 12  | 13       |                                              |
| <b>Perch muscle</b>            |                         |              |            |         |                       |            |     |          |                                              |
| 4                              | Holmöarna               | 179          | 18         | 89-12   | -1.3(-1.4,4.0)        | 0.3110     | 12  | 12       | 0.004 (0.004,0.005) m                        |
| 4                              | Holmöarna               |              | 9          | 03-12   | -1.3(-1.4,4.0)        | 0.2180     | 6   | 3.2      |                                              |
| 14                             | Kvädöfjärden            | 180          | 18         | 94-12   | .38(-.76,1.5)         | 0.4990     | 7   | 4.3      | 0.005 (0.005,0.006) m                        |
| 14                             | Kvädöfjärden            |              | 10         | 03-12   | -1.6(-4.5,1.3)        | 0.2399     | 7   | 4.2      |                                              |
| <b>Eelpout muscle</b>          |                         |              |            |         |                       |            |     |          |                                              |
| 4                              | Holmöarna               | 87           | 11         | 95-07   | -1.9(-8.6,4.9)        | 0.5500     | 12  | 14       | 0.006 (0.004,0.009) m                        |

|                      |              |     |    |       |                 |            |    |     |                       |
|----------------------|--------------|-----|----|-------|-----------------|------------|----|-----|-----------------------|
| 4                    | Holmöarna    |     | 9  | 98-07 | -6.7(-14,.55)   | 0 0630     | 11 | 10  |                       |
| 14                   | Kvädöfjärden | 120 | 17 | 95-12 | -4.7(-6.1,-3.3) | 0.0000 --- | 7  | 4.8 | 0.005 (0.004,0.005)   |
| 14                   | Kvädöfjärden |     | 10 | 03-12 | -4.2(-7.7,.66)  | 0.0250     | 7  | 5.0 |                       |
| 12                   | Fjällbacka   | 105 | 16 | 97-12 | .21(-3.8,4.2)   | 0.8770     | 12 | 13  | 0.005 (0.005,0.006) m |
| 12                   | Fjällbacka   |     | 10 | 03-12 | 4.0(-4.3,12)    | 0 2950     | 12 | 12  |                       |
| <b>Blue mussel</b>   |              |     |    |       |                 |            |    |     |                       |
| 15                   | Nidingen     | 87  | 23 | 88-12 | -3.4(-6.0,-.91) | 0.0100 -   | 14 | 16  | 0.003 (0.002,0.004)   |
| 15                   | Nidingen     |     | 10 | 03-12 | -2.9(-8.4,2.5)  | 0.2460     | 8  | 6.4 |                       |
| 12                   | Fjällbacka   | 89  | 22 | 89-12 | -1.6(-2.9,-.34) | 0.0150 -   | 9  | 7.2 | 0.003 (0.002,0.003)   |
| 12                   | Fjällbacka   |     | 10 | 03-12 | -2.1(-7.5,3.3)  | 0.3860     | 8  | 6.3 |                       |
| 14                   | Kvädöfjärden | 80  | 16 | 96-12 | -5.9(-8.5,-3.4) | 0.0000 --- | 10 | 8.8 | 0.006 (0.005,0.008)   |
| 14                   | Kvädöfjärden |     | 10 | 03-12 | -8.9(-15,-2.3)  | 0.0150 -   | 9  | 7.8 |                       |
| <b>Guillemot egg</b> |              |     |    |       |                 |            |    |     |                       |
| 16                   | Stora Karlsö | 248 | 25 | 88-12 | -8.5(-9.5,-7.5) | 0.0000 --- | 8  | 6.3 | 0.12 (0.11,0.14)      |
| 16                   | Stora Karlsö |     | 10 | 03-12 | -6.5(-8.5,-4.5) | 0.0000 --- | 6  | 2.6 |                       |

**Table S7** Trend for the entire period and the last 10 years (in %) for **HCb** assessed from the annual geometric mean ( $\mu\text{g g}^{-1}$  lipid weight) in herring, perch, cod, eelpout, blue mussel and guillemot egg. P shows the p-value and – after the p-value means that the trend is negative and + means that the trend is positive; -/+ p<0.05, -/+ p<0.01, -/+ p<0.001. YRQ: years required to detect an annual change of 10% with a power of 80%. LDT: lowest detectable trend within a 10 year period with a power of 80%. Last year's HCB concentration values are estimated from the trend if p<0.05 and from the mean (m) if no trend is present. Numbers in brackets are 95% confidence intervals (C.I.). The total number of samples and the number of years for the various time-series are shown in columns two to four

| Site number<br>(from figure 1) | Matrix<br>Sampling site | N<br>samples | N<br>years | Year  | Trend %<br>(95% C.I.) | P          | YRQ | LDT<br>% | Last year $\mu\text{g/g l.w.}$<br>(95% C.I.) |
|--------------------------------|-------------------------|--------------|------------|-------|-----------------------|------------|-----|----------|----------------------------------------------|
| <b>Herring muscle</b>          |                         |              |            |       |                       |            |     |          |                                              |
| 2                              | Harufjärden             | 333          | 24         | 87-12 | -2.5(-4.2,-0.86)      | 0.0046 --  | 11  | 10       | 0.015 (0.012,0.019)                          |
| 2                              | Harufjärden             |              | 10         | 03-12 | 4.1(-0.42,8.7)        | 0.0679     | 8   | 6.4      |                                              |
| 8                              | Ångskärsklubb           | 320          | 23         | 89-12 | -5.6(-8.2,-3.0)       | 0.0002 --- | 13  | 16       | 0.010 (0.007,0.014)                          |
| 8                              | Ångskärsklubb           |              | 10         | 03-12 | -0.95(-15,13)         | 0.8501     | 16  | 21       |                                              |
| 8                              | Ångskärsklubb spring    | 277          | 24         | 89-12 | -6.5(-9.0,-3.9)       | 0.0000 --- | 13  | 16       | 0.029 (0.021,0.041)                          |
| 8                              | Ångskärsklubb spring    |              | 10         | 03-12 | -8.3(-21,4.3)         | 0.1648     | 15  | 19       |                                              |
| 11                             | Landsort                | 342          | 25         | 87-12 | -4.1(-6.3,-2.0)       | 0.0006 --- | 13  | 15       | 0.020 (0.015,0.027)                          |
| 11                             | Landsort                |              | 10         | 03-12 | 1.5(-7.9,11)          | 0.7225     | 12  | 14       |                                              |
| 21                             | Utlängan                | 309          | 25         | 88-12 | -4.6(-7.1,-2.2)       | 0.0007 --- | 13  | 16       | 0.018 (0.013,0.025)                          |
| 21                             | Utlängan                |              | 10         | 03-12 | 3.4(-7.0,14)          | 0.4805     | 13  | 15       |                                              |
| 21                             | Utlängan spring         | 272          | 24         | 87-12 | -7.0(-9.3,-4.8)       | 0.0000 --- | 13  | 14       | 0.022 (0.016,0.029)                          |
| 21                             | Utlängan spring         |              | 10         | 03-12 | 0.63(-9.4,11)         | 0.8592     | 13  | 15       |                                              |
| 17                             | Fladen                  | 380          | 25         | 88-12 | -5.7(-7.4,-4.0)       | 0.0000 --- | 11  | 11       | 0.006 (0.004,0.007)                          |
| 17                             | Fladen                  |              | 10         | 03-12 | 4.3(-0.18,8.7)        | 0.0563     | 8   | 6.3      |                                              |
| 13                             | Väderöarna              | 270          | 16         | 95-12 | -2.1(-5.8,1.6)        | 0.2402     | 13  | 14       | 0.006 (0.004,0.009) m                        |
| 13                             | Väderöarna              |              | 9          | 03-12 | 6.7(-0.59,14)         | 0.0647     | 11  | 10       |                                              |
| <b>Cod Liver</b>               |                         |              |            |       |                       |            |     |          |                                              |
| 19                             | SE Gotland              | 187          | 24         | 89-12 | -4.8(-7.1,-2.5)       | 0.0004 --- | 13  | 14       | 0.020 (0.014,0.027)                          |
| 19                             | SE Gotland              |              | 10         | 03-12 | 4.1(-3.5,12)          | 0.2474     | 11  | 11       |                                              |
| 17                             | Fladen                  | 194          | 23         | 89-12 | -4.2(-6.3,-2.1)       | 0.0005 --- | 12  | 12       | 0.009 (0.007,0.012)                          |
| 17                             | Fladen                  |              | 10         | 03-12 | -1.4(-8.2,5.5)        | 0.6613     | 10  | 9.9      |                                              |
| <b>Perch muscle</b>            |                         |              |            |       |                       |            |     |          |                                              |
| 4                              | Holmöarna               | 179          | 18         | 89-12 | -3.1(-6.2,-0.03)      | 0.0457-    | 13  | 14       | 0.007 (0.005,0.010)                          |
| 4                              | Holmöarna               |              | 9          | 03-12 | 7.4(1.9,13)           | 0.0152 +   | 9   | 7.6      |                                              |
| 10                             | Kvädöfjärden            | 241          | 25         | 84-12 | -2.3(-5.1,0.46)       | 0.0936     | 15  | 19       | 0.006 (0.004,0.008)                          |
| 10                             | Kvädöfjärden            |              | 10         | 03-12 | 12(2.7,21)            | 0.0170 +   | 12  | 13       |                                              |
| <b>Eelpout muscle</b>          |                         |              |            |       |                       |            |     |          |                                              |
| 4                              | Holmöarna               | 96           | 11         | 95-07 | -9.9(-19,-1.2)        | 0.0295-    | 15  | 18       | 0.016 (0.009,0.028)                          |
| 4                              | Holmöarna               |              | 9          | 98-07 | -13(-27,0.026)        | 0.0491-    | 15  | 20       |                                              |

|                      |              |     |    |       |                 |            |    |     |                       |
|----------------------|--------------|-----|----|-------|-----------------|------------|----|-----|-----------------------|
| 14                   | Kvädöfjärden | 121 | 17 | 95-12 | 1.0(-3.6,5.6)   | 0.6424     | 14 | 17  | 0.014 (0.009,0.022) m |
| 14                   | Kvädöfjärden |     | 10 | 03-12 | 9.4(-2.5,21)    | 0.1041     | 14 | 18  |                       |
| 12                   | Fjällbacka   | 131 | 18 | 95-12 | -0.67(-2.8,1.5) | 0.5263     | 9  | 8.2 | 0.008 (0.006,0.010) m |
| 12                   | Fjällbacka   |     | 10 | 03-12 | 4.5(-0.51,9.6)  | 0.0701     | 9  | 7.2 |                       |
| <b>Blue mussel</b>   |              |     |    |       |                 |            |    |     |                       |
| 15                   | Nidingen     | 97  | 25 | 88-12 | 2.6(0.78,4.5)   | 0.0068 ++  | 11 | 12  | 3.5 (2.7,4.4)         |
| 15                   | Nidingen     |     | 10 | 03-12 | 4.6(-0.58,10)   | 0.0738     | 9  | 7.2 |                       |
| 12                   | Fjällbacka   | 95  | 24 | 88-12 | -0.82(-3.4,1.8) | 0.5326     | 14 | 17  | 2.4 (1.7,3.4) m       |
| 12                   | Fjällbacka   |     | 10 | 03-12 | .25(-4.4,5.2)   | 0.8734     | 9  | 6.8 |                       |
| 14                   | Kvädöfjärden | 90  | 18 | 95-12 | -1.6(-4.5,1.3)  | 0.2453     | 11 | 11  | 5.0 (3.7,6.7) m       |
| 14                   | Kvädöfjärden |     | 10 | 03-12 | -3.3(-11,5.0)   | 0.3813     | 12 | 12  |                       |
| <b>Guillemot egg</b> |              |     |    |       |                 |            |    |     |                       |
| 16                   | Stora Karlsö | 258 | 26 | 79-12 | -5.2(-6.5,-3.9) | 0.0000 --- | 10 | 8.7 | 0.55 (0.45,0.66)      |
| 16                   | Stora Karlsö |     | 10 | 03-12 | -2.5(-6.7,1.8)  | 0.2087     | 8  | 6.2 |                       |

A)

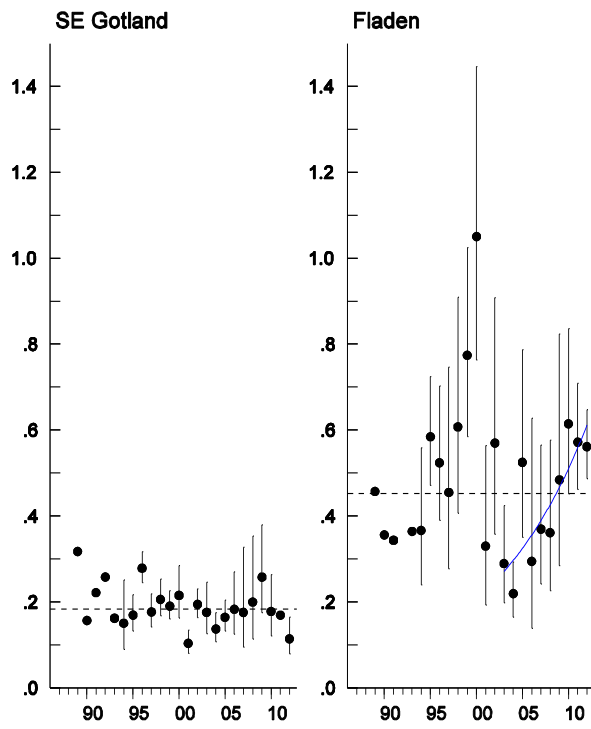

B)

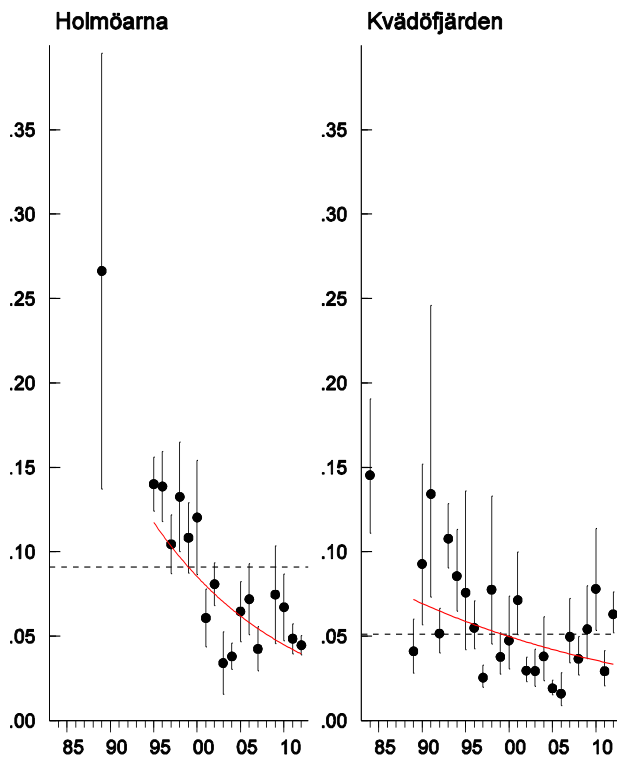



C)

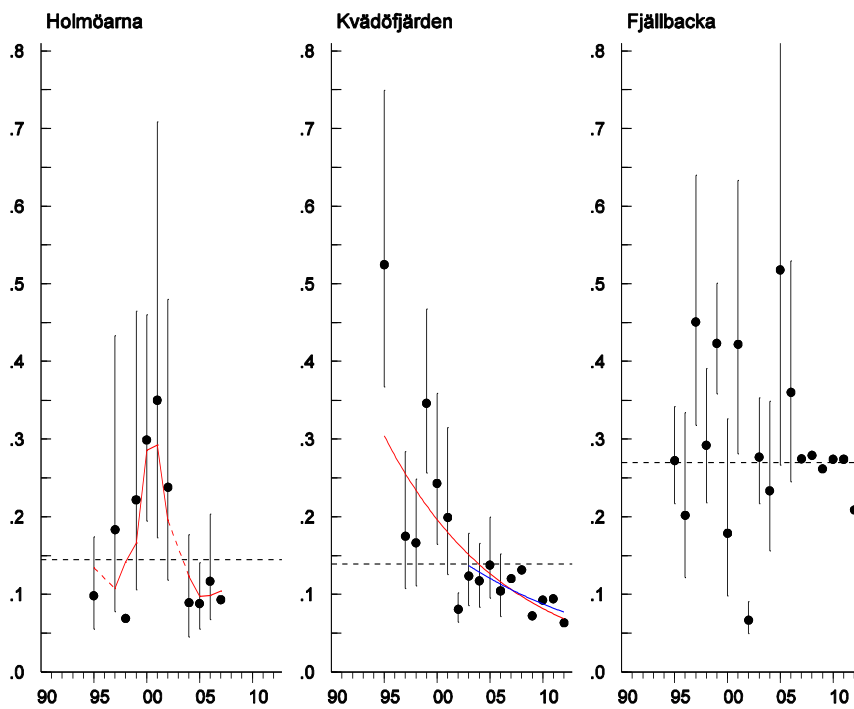

D)

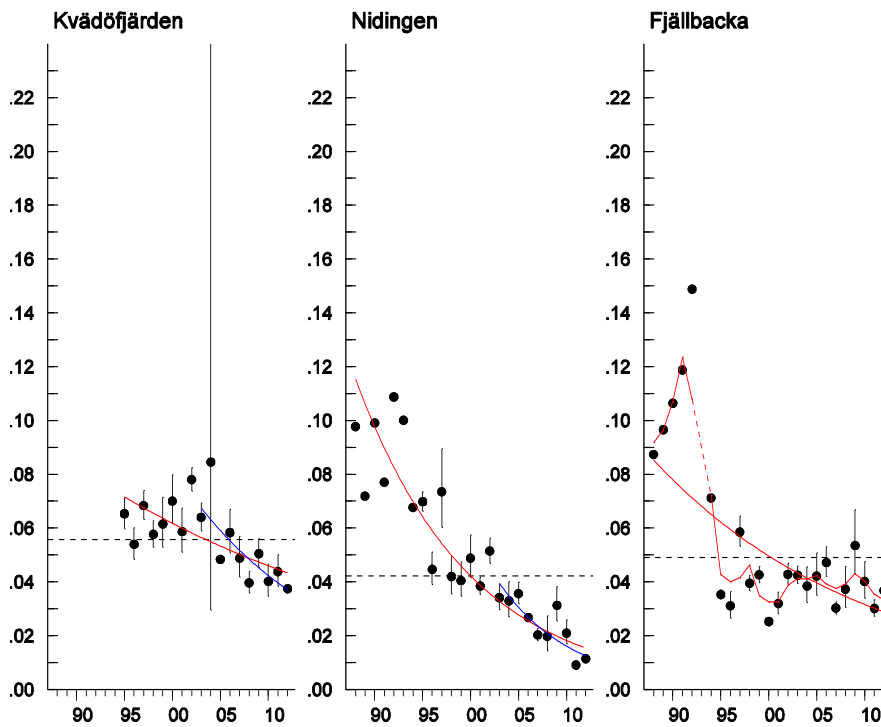

**Fig. S1** CB-153 concentrations (µg g<sup>-1</sup> lipid weight) in **A**) cod liver from SE Gotland and Fladen; **B**) perch muscle from Holmöarna and Kvädöfjärden; **C**) eelpout muscle from Holmöarna, Kvädöfjärden and Fjällbacka; **D**) blue mussels from Kvädöfjärden, Nidingen and Fjällbacka. The linear red lines show significant trends over the whole period and the linear blue lines significant trends for the ten last years (p < 0.05). The red smoothed lines show non-linear trends (p < 0.05). The black dotted horizontal line shows the geometric mean concentration over the whole period. Each figure displays the geometric mean concentration for each year (circles) and 95% confidence intervals for the geometric means.

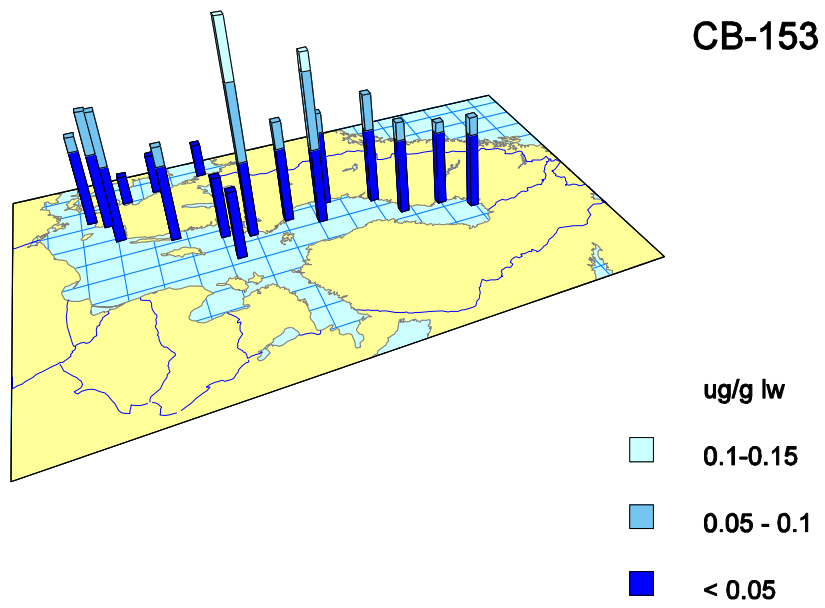

**Fig. S2** Spatial variation in concentration ( $\mu\text{g g}^{-1}$  lipid weight) in herring muscle of CB-153. Arithmetic mean values from 2010-2012.

A)

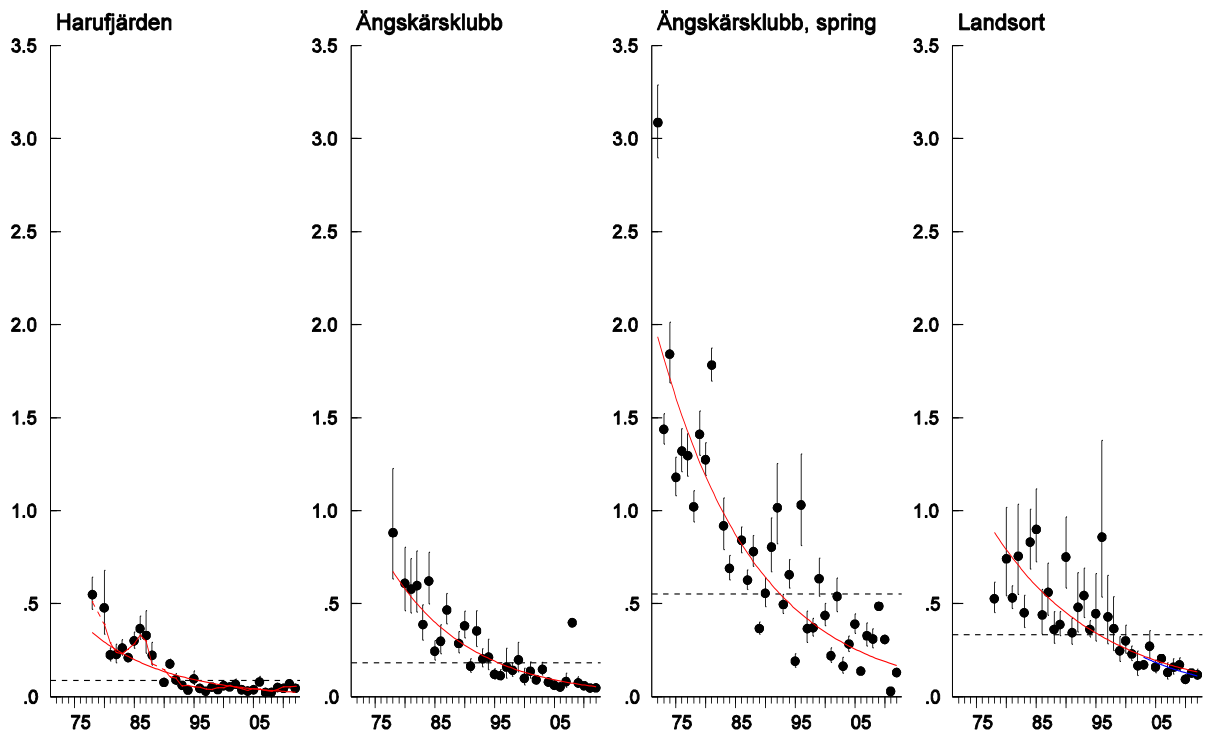

B)

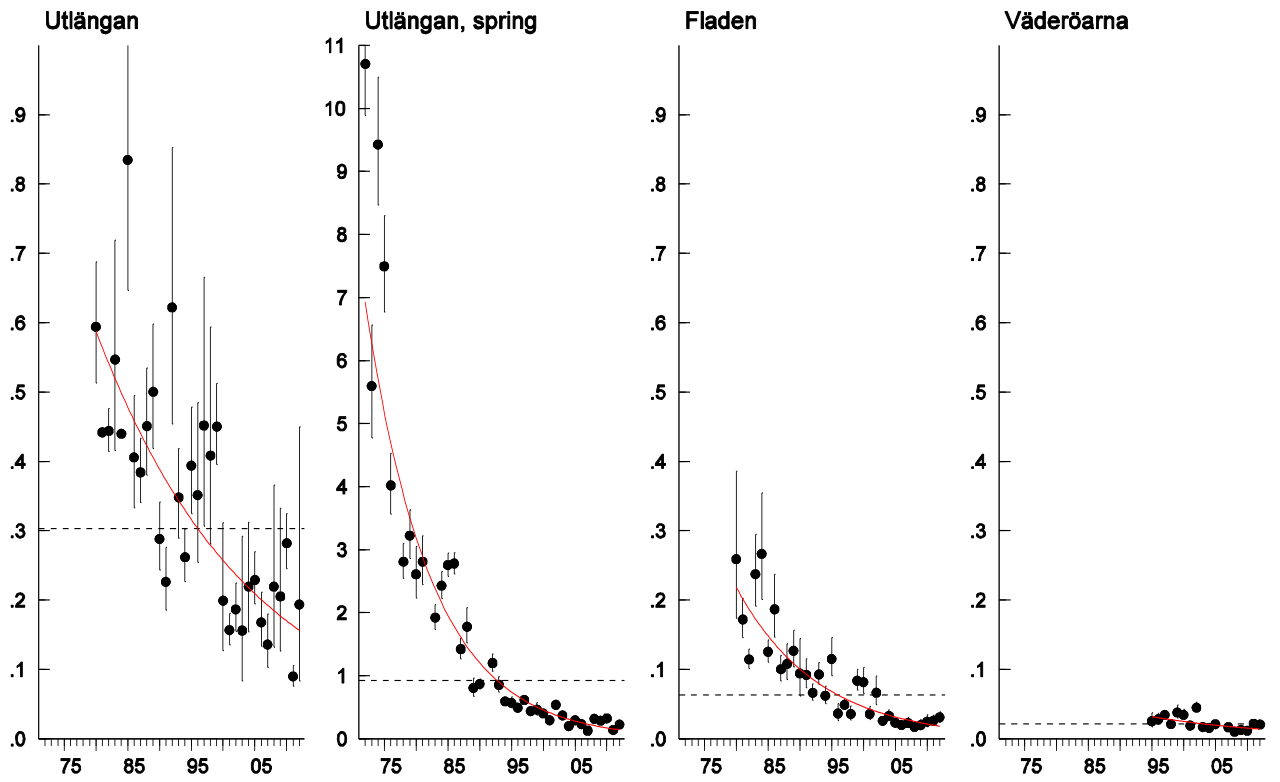

C)

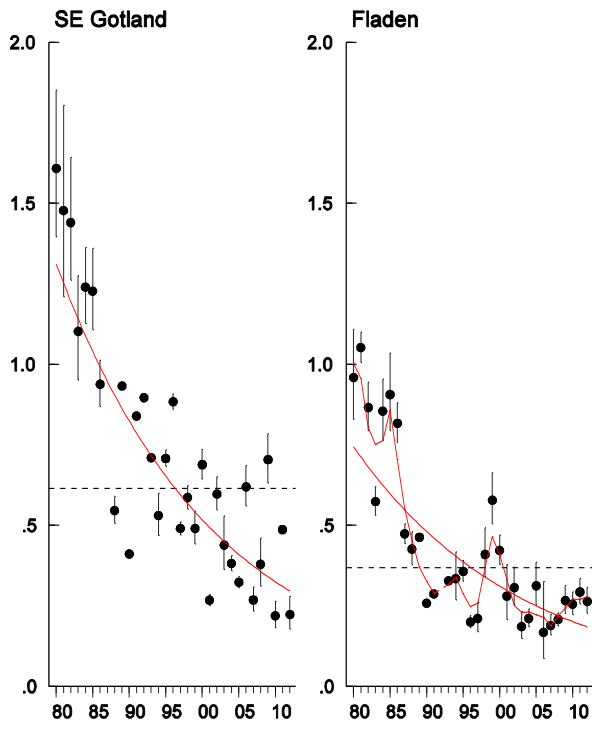

D)

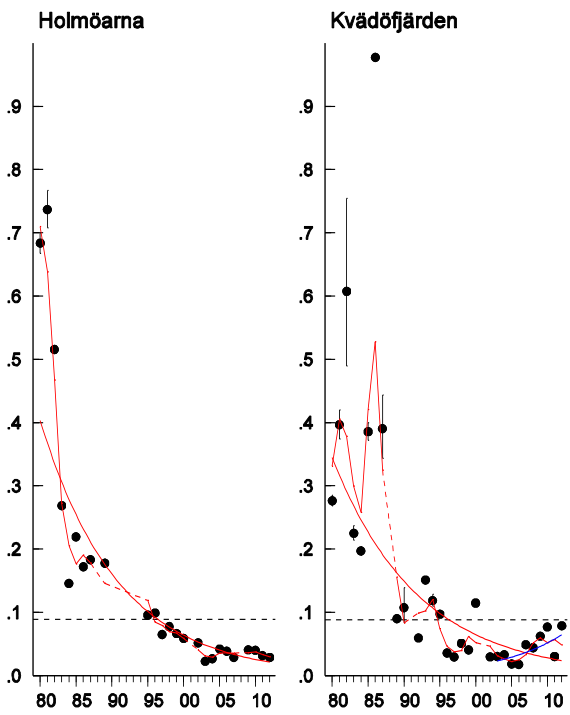

E)

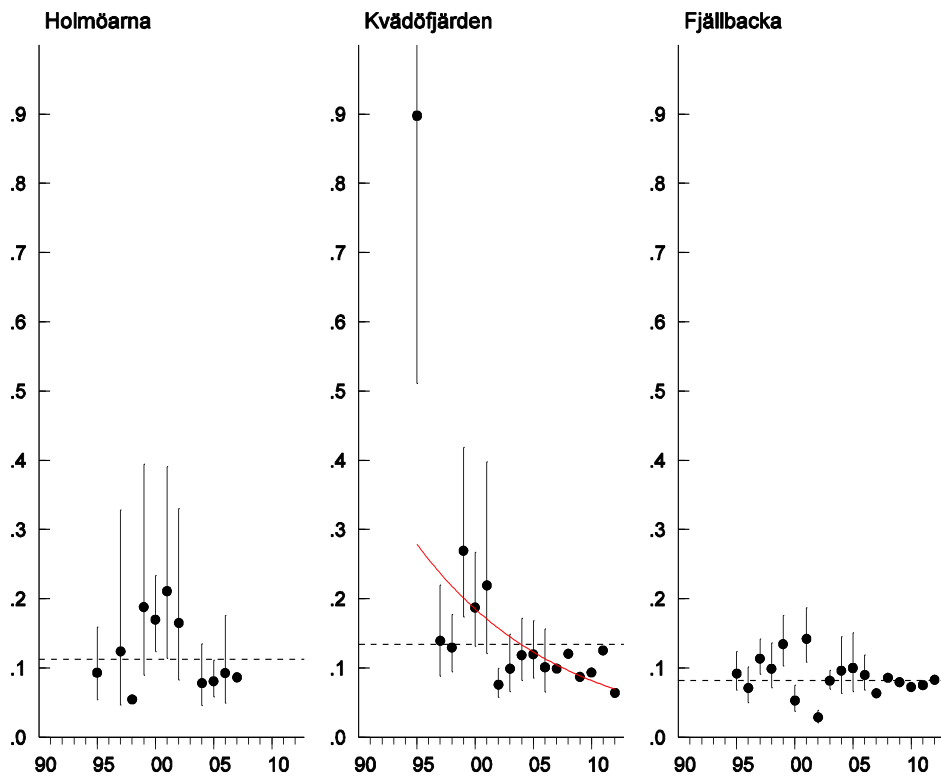

F)

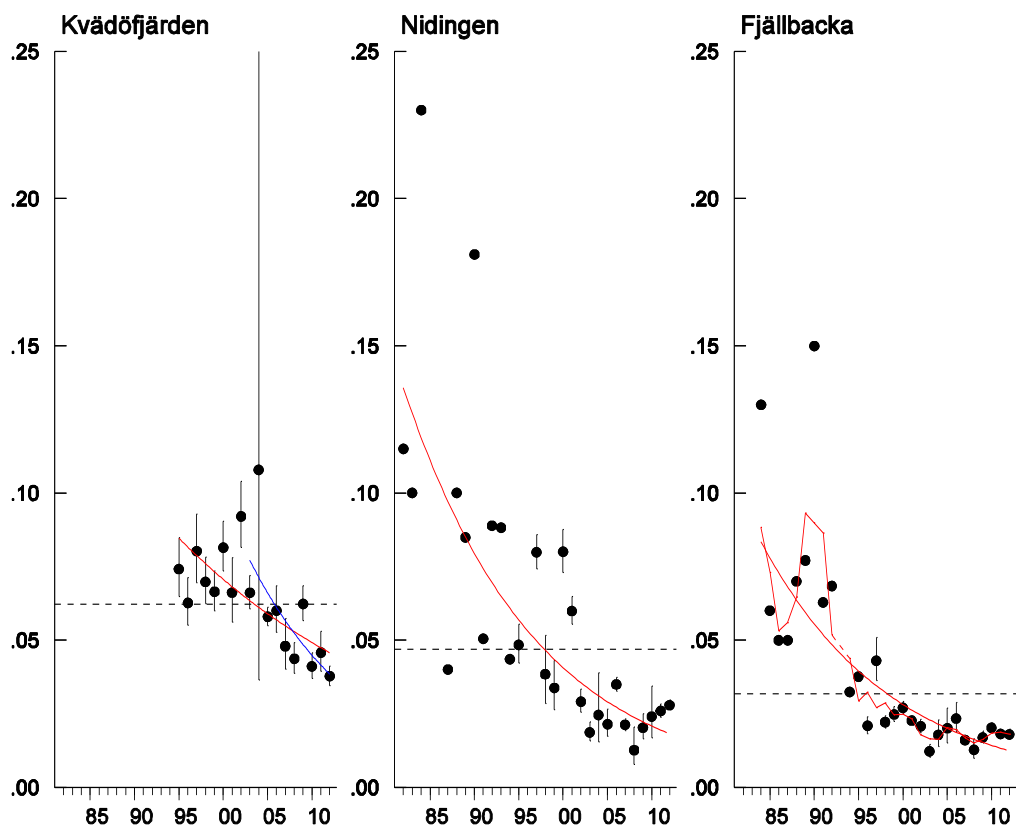

G)

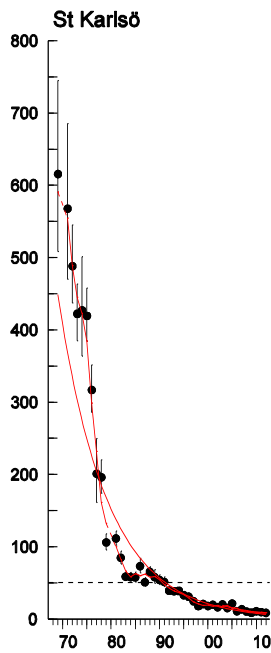

**Fig. S3** DDE concentrations ( $\mu\text{g g}^{-1}$  lipid weight) in **A**) herring muscle from Harufjärden, Ängskärsklubb (autumn and spring, geometric means from spring are fat adjusted) and Landsort; **B**) herring muscle from Utlängan (autumn and spring, geometric means from spring are fat adjusted), Fladen, and Väderöarna (note the different scale for spring caught herring) **Note** the different scaling for Utlängan spring; **C**) cod liver from SE Gotland and Fladen, geometric means are fat adjusted; **D**) perch muscle from Holmöarna and Kvädöfjärden; **E**) eelpout muscle from Holmöarna, Kvädöfjärden and Fjällbacka; **F**) blue mussels from Kvädöfjärden, Nidingen and Fjällbacka; **G**) guillemot egg from Stora (St) Karlsö.. The linear red lines show significant trends over the whole period and the linear blue lines significant trends for the ten last years ( $p < 0.05$ ). The red smoothed lines show non-linear trends ( $p < 0.05$ ). The black dotted horizontal line shows the geometric mean concentration over the whole period. Each figure displays the geometric mean concentration for each year (circles) and the 95% confidence intervals of the geometric means

A)

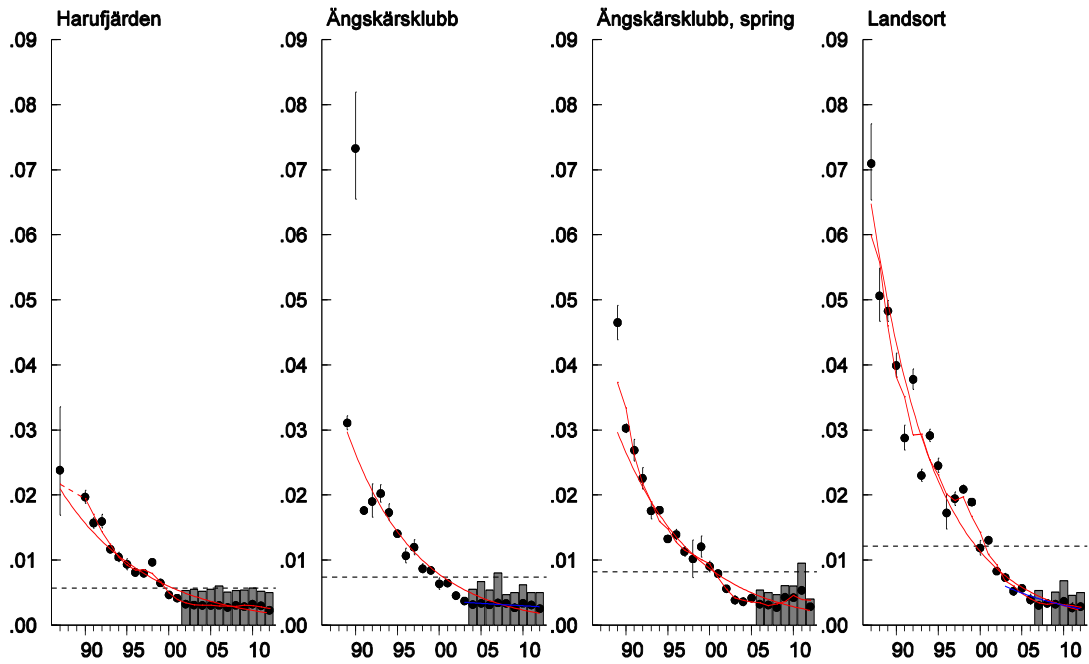

B)

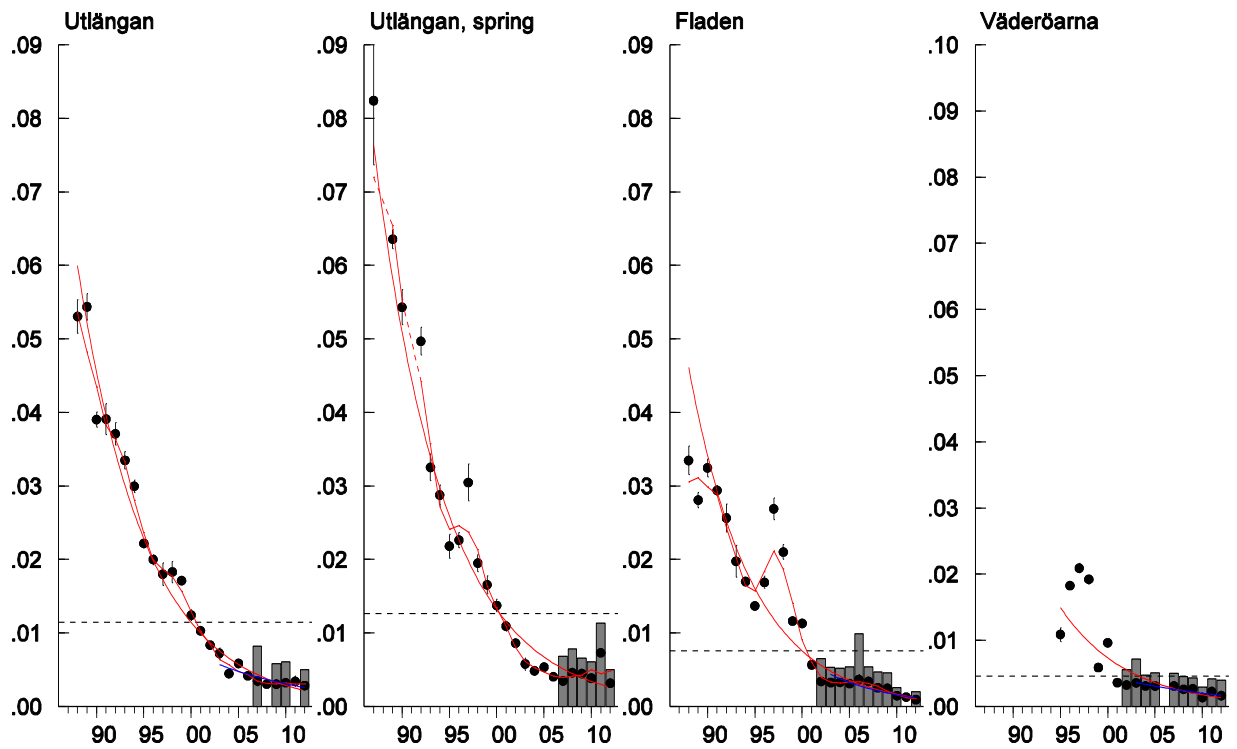

C)

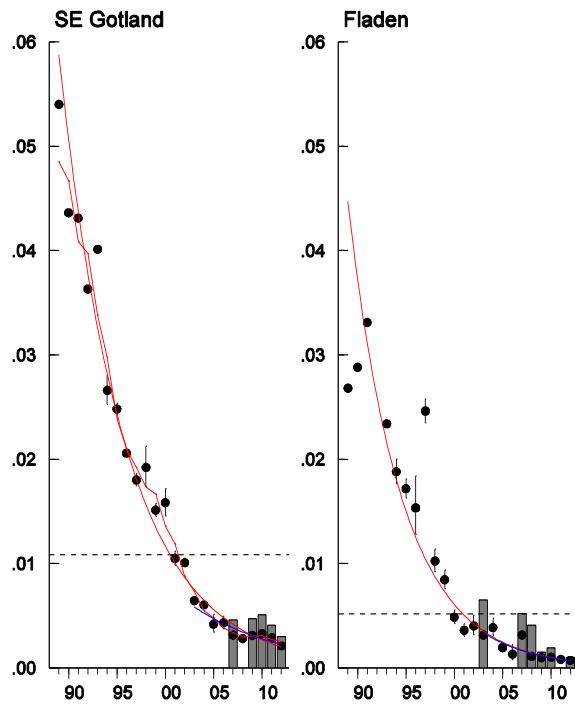

D)

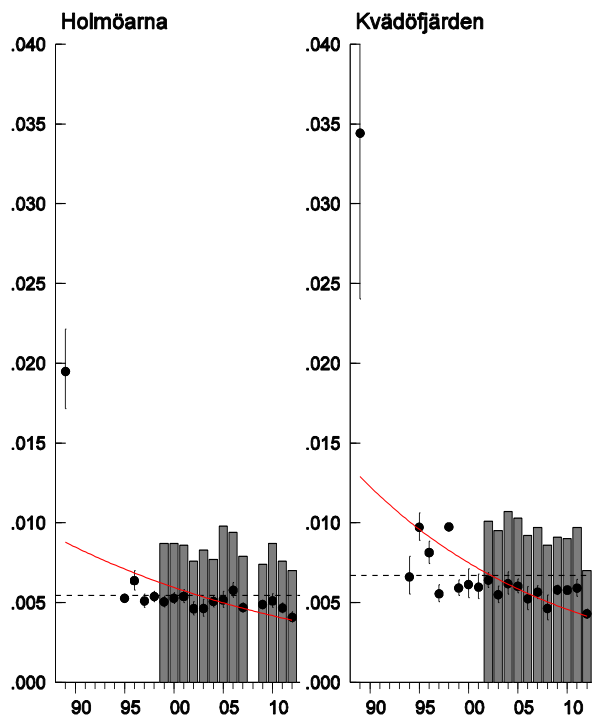



E)

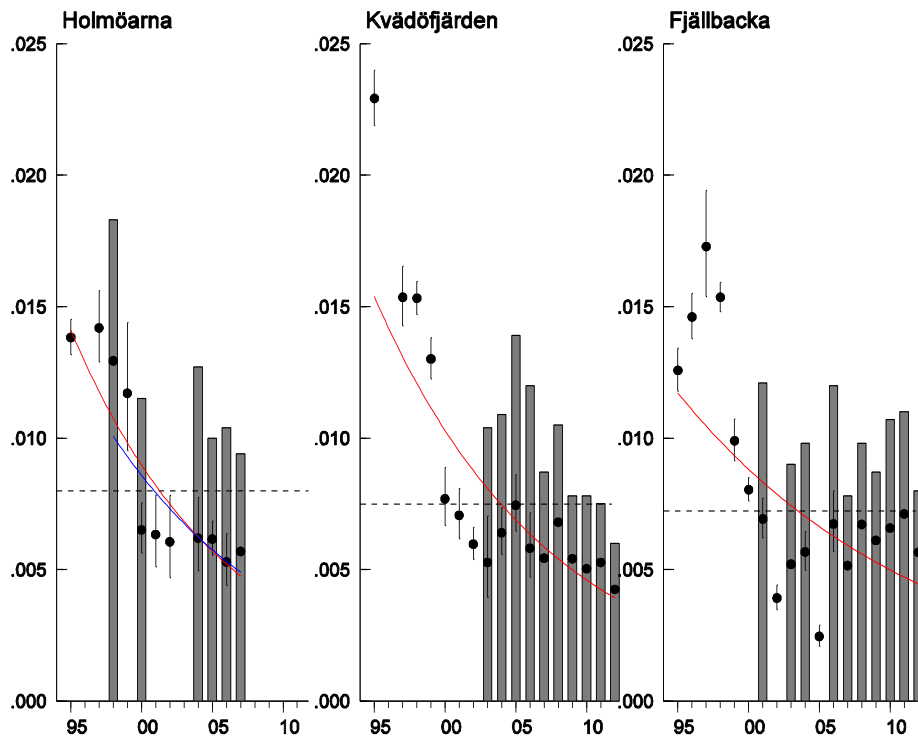

F)

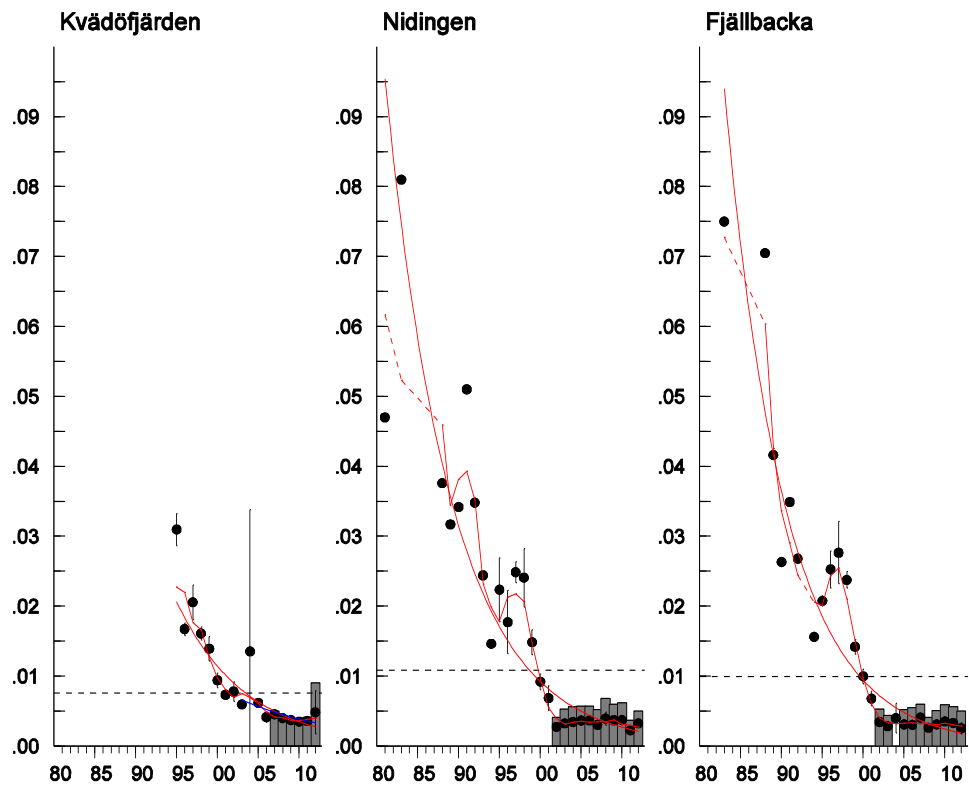

G)

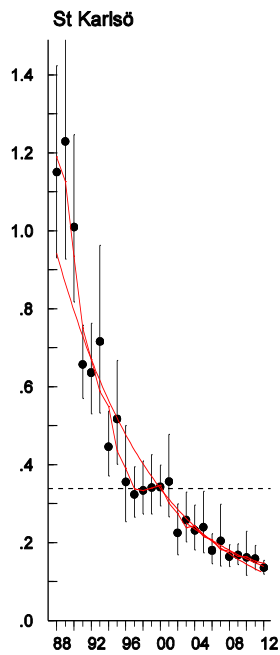

**Fig. S4**  $\gamma$ -HCH concentrations ( $\mu\text{g g}^{-1}$  lipid weight) in **A**) herring muscle from Harufjärden, Ängskärsklubb (autumn and spring) and Landsort; **B**) herring muscle from Utlängan (autumn and spring), Fladen, and Väderöarna; **C**) cod liver from SE Gotland and Fladen, geometric means are fat adjusted; **D**) perch muscle from Holmöarna and Kvädöfjärden; **E**) eelpout muscle from Holmöarna, Kvädöfjärden and Fjällbacka; **F**) blue mussels from Kvädöfjärden, Nidingen and Fjällbacka.  **$\beta$ -HCH** concentrations in **G**) guillemot egg from Stora (St) Karlsö. The linear red lines show significant trends over the whole period and the linear blue lines significant trends for the ten last years ( $p < 0.05$ ). The red smoothed lines show non-linear trends ( $p < 0.05$ ). The black dotted horizontal line shows the geometric mean concentration over the whole period. Each figure displays the geometric mean concentration for each year (circles) and the 95% confidence intervals of the geometric means. In time series where all values in one year were below LOQ, a grey bar shows the maximum LOQ and a dot represents the geometric mean value estimated from the individual LOQs divided by the square root of 2.

A)

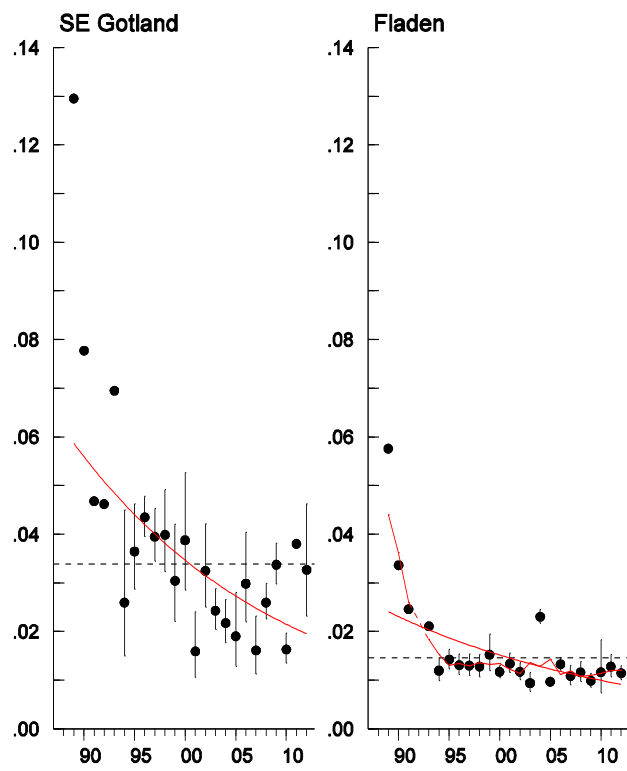

B)

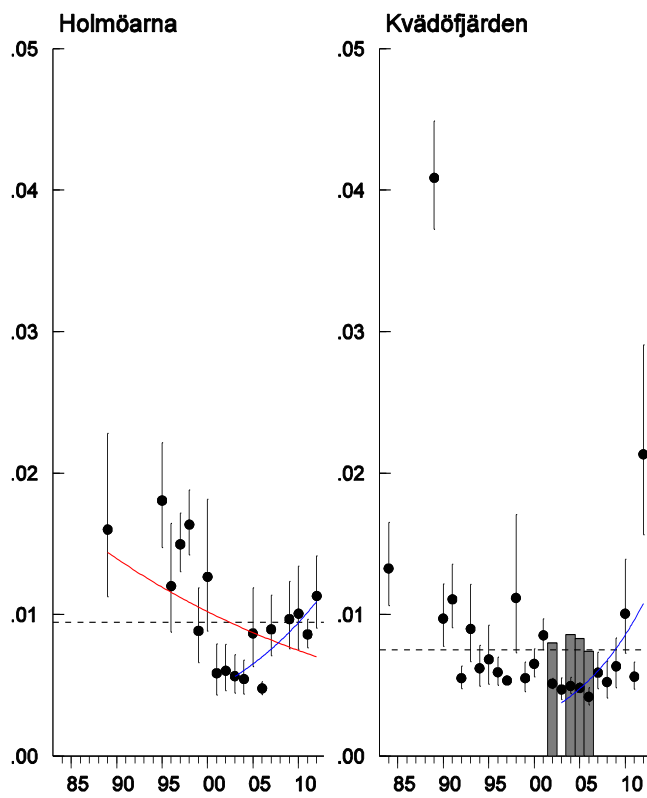

C)

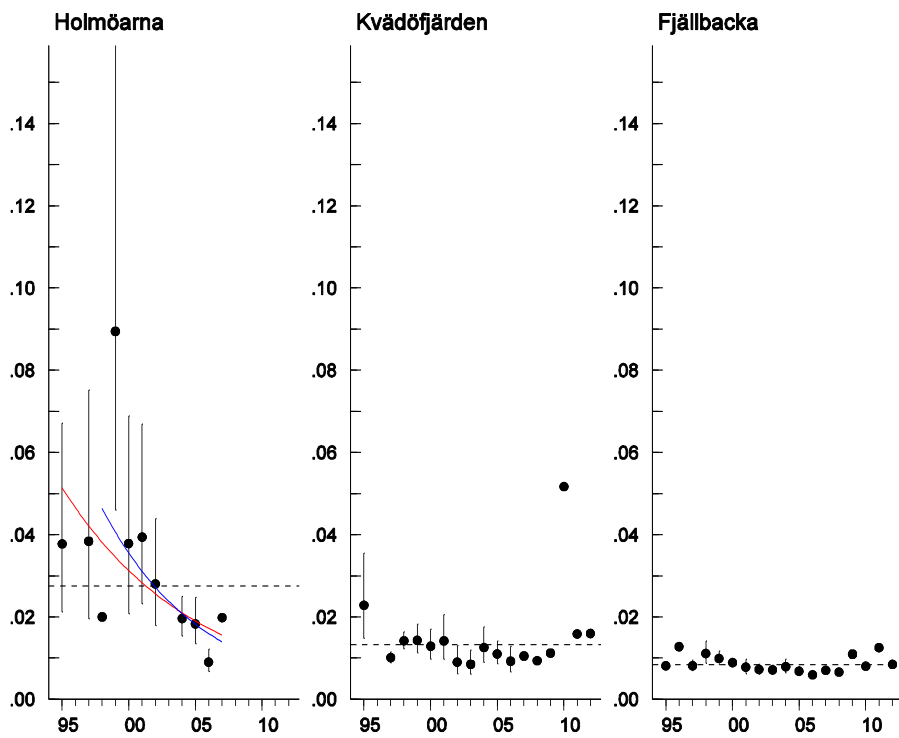

D)

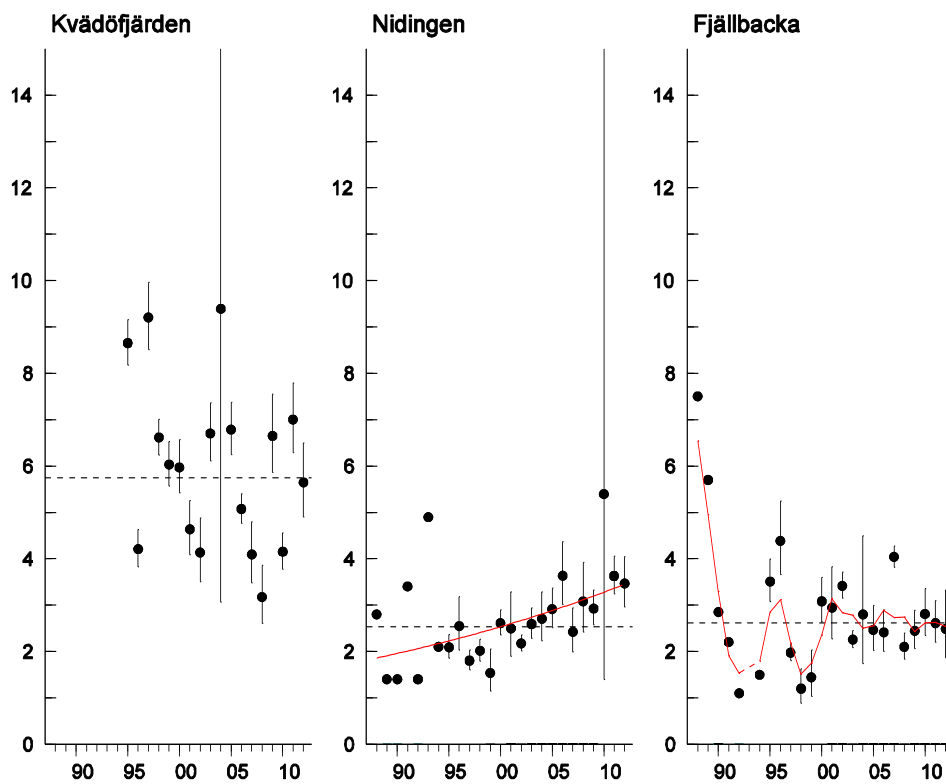

**Fig. S5** HCB concentrations ( $\mu\text{g g}^{-1}$  lipid weight) in **A**) cod liver from SE Gotland and Fladen; **B**) perch muscle from Holmöarna and Kvädöfjärden; **C**) eelpout muscle from Holmöarna, Kvädöfjärden and Fjällbacka; **D**) blue mussels from Kvädöfjärden, Nidingen and Fjällbacka. The linear red lines show significant trends over the whole period and the linear blue lines significant trends for the ten last years ( $p < 0.05$ ). The red smoothed lines

show non-linear trends ( $p < 0.05$ ). The black dotted horizontal line shows the geometric mean concentration over the whole period. Each figure displays the geometric mean concentration of each year (circles) and the 95% confidence intervals of the geometric means. In time series where all values in one year were below LOQ, a grey bar shows the maximum LOQ and a dot represents the geometric mean value estimated from the individual LOQs divided by the square root of 2.
